# Supplementary material for: Highly active and stable surface structure for oxygen evolution reaction originating from balanced dissolution and strong connectivity in BaIrO3 solid solutions
Source: Royal Society of Chemistry journal article supplement (doi:10.1039/d2ra04624e), 2022-01-01
Supplement: d2ra04624e1.pdf [file d2ra04624e1.pdf]

## Supporting Information

### **Highly active and stable surface structure for oxygen evolution reaction originating from balanced dissolution and strong connectivity in BaIrO<sub>3</sub> solid solutions**

Shigeto Hirai<sup>a\*</sup>, Shunsuke Yagi<sup>b</sup>, He-Chan Oh<sup>a</sup>, Yoshiki Sato<sup>a</sup>, Wei Liu<sup>b</sup>, En-Pei Liu<sup>c</sup>,  
Wei-Tin Chen<sup>c,d</sup>, Akira Miura<sup>e</sup>, Masanori Nagao<sup>f</sup>, Tomoya Ohno<sup>a</sup>, and Takeshi Matsuda<sup>a</sup>

<sup>a</sup> School of Earth, Energy and Environmental Engineering, Kitami Institute of Technology,  
165 Koen-cho, Kitami 090-8507, Japan.

<sup>b</sup> Institute of Industrial Science, The University of Tokyo, 4-6-1 Komaba Meguro-ku,  
Tokyo 153-8505, Japan.

<sup>c</sup> Center for Condensed Matter Sciences and Center of Atomic Initiative for New  
Materials, National Taiwan University, Taipei 10617, Taiwan.

<sup>d</sup> Taiwan Consortium of Emergent Crystalline Materials, Ministry of Science and  
Technology, Taipei 10622, Taiwan.

<sup>e</sup> Graduate School of Chemical Sciences and Engineering and Faculty of Engineering,  
Hokkaido University, Sapporo 060-8628, Japan.

<sup>f</sup> University of Yamanashi, 7-32 Miyamae, Kofu, Yamanashi 400-0021, Japan.

\* Corresponding author: e-mail [hirai@mail.kitami-it.ac.jp](mailto:hirai@mail.kitami-it.ac.jp)

## Supplementary Results

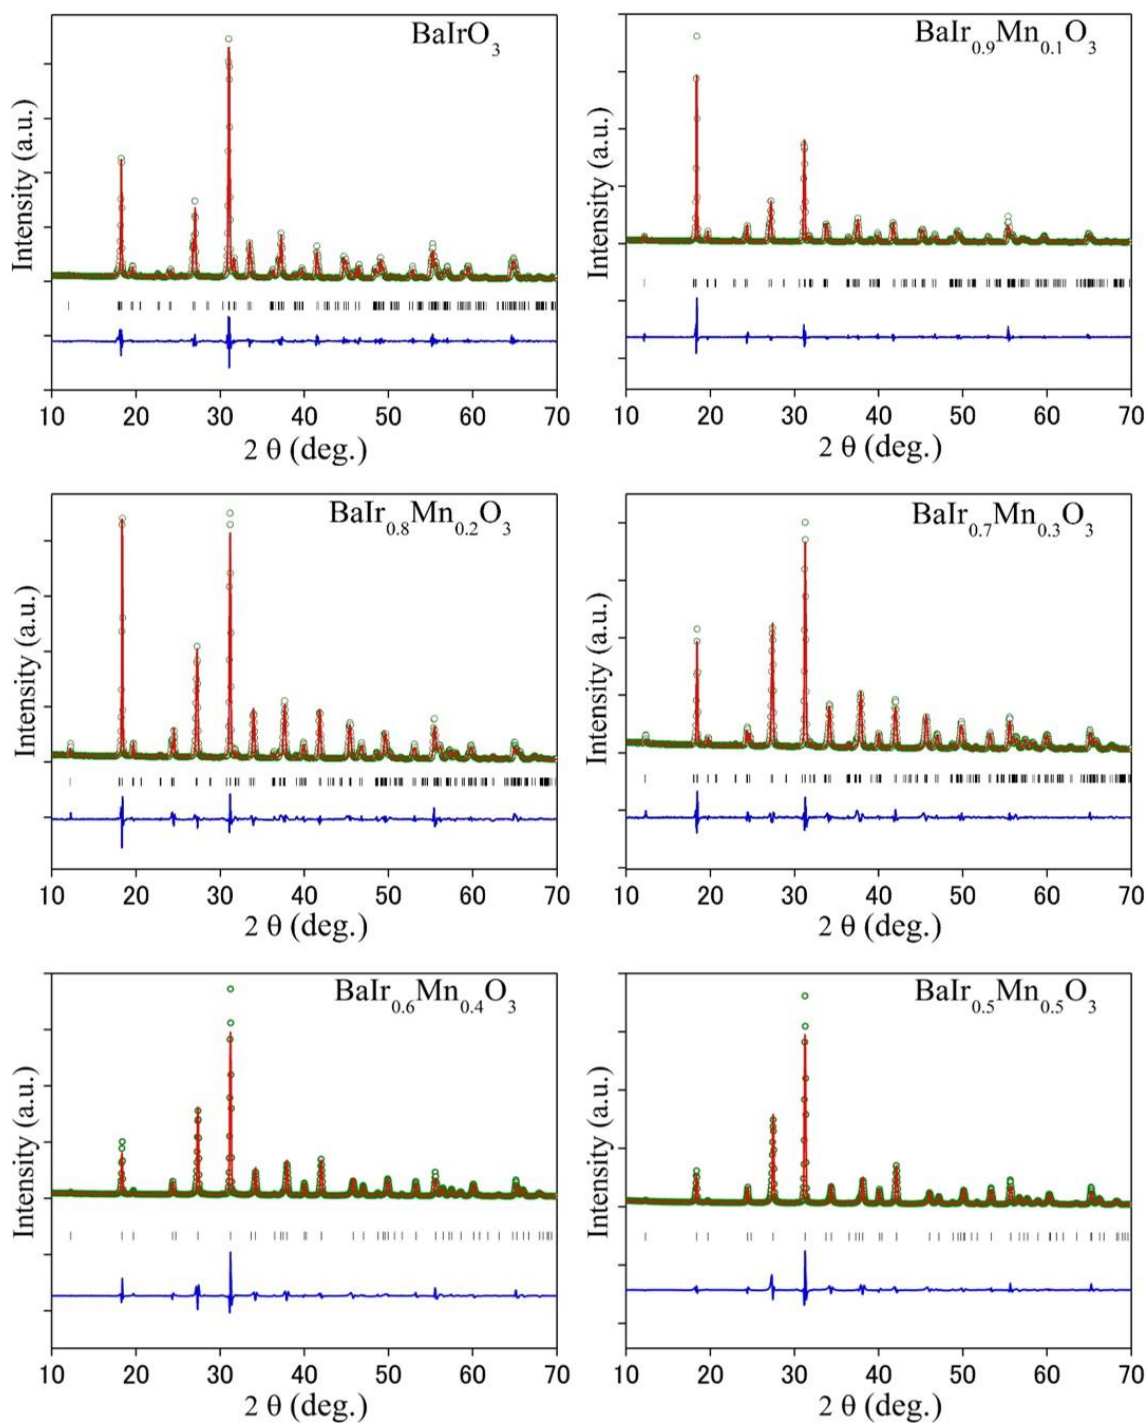

**Fig. S1.** XRD profiles and Rietveld refinement results of  $\text{BaIr}_{1-x}\text{Mn}_x\text{O}_3$ . The green circles and the red line indicate the observed and calculated profile, respectively. The blue line displays the difference between the observed and calculated profile. The black tick marks indicate the Bragg reflection positions of  $\text{BaIr}_{1-x}\text{Mn}_x\text{O}_3$ . Wavelength  $\lambda = 1.540598 \text{ \AA}$ .

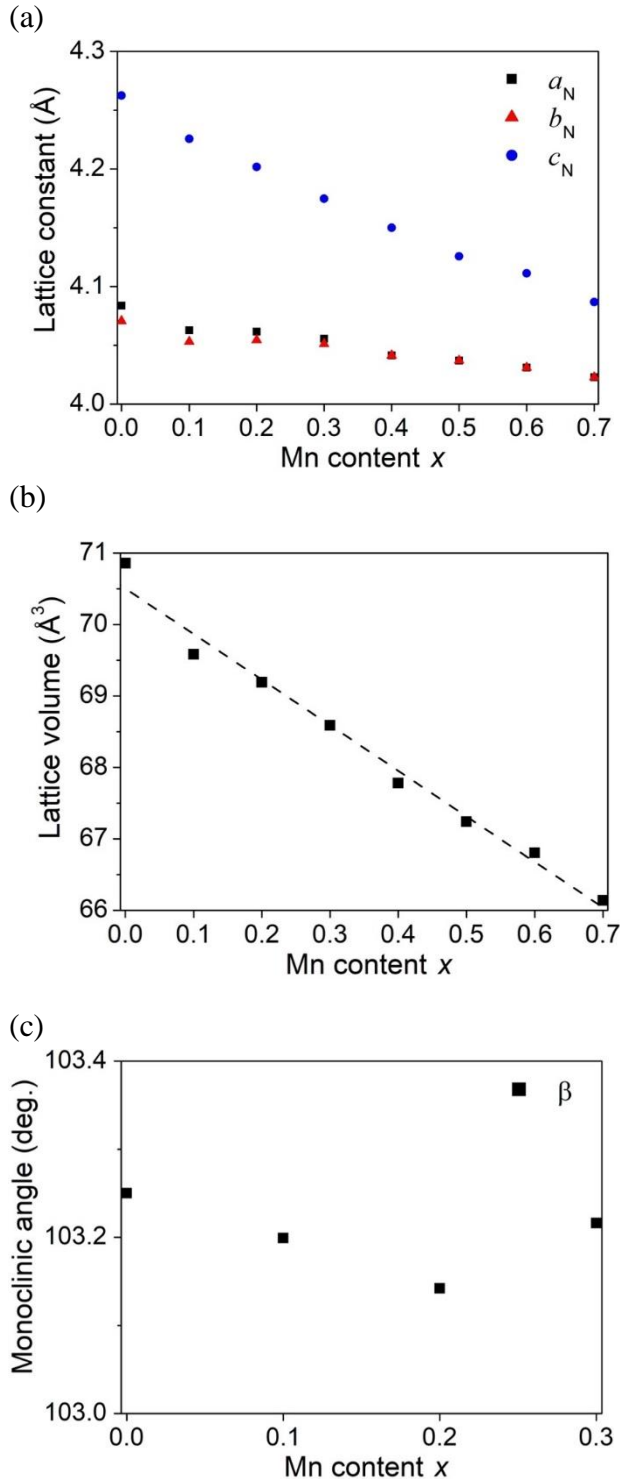

**Fig. S2.** Lattice constants of  $\text{BaIr}_{1-x}\text{Mn}_x\text{O}_3$ . (a, b, c) Evolution of the normalized lattice parameter  $a_N$ ,  $b_N$ ,  $c_N$ , lattice volume per chemical formula unit ( $V_N$ ) and the monoclinic  $\beta$  angle for  $\text{BaIr}_{1-x}\text{Mn}_x\text{O}_3$ . The dashed line is a guide for the linear relationship between  $V_N$  and Mn content. Standard deviation for the data is within the symbol size.

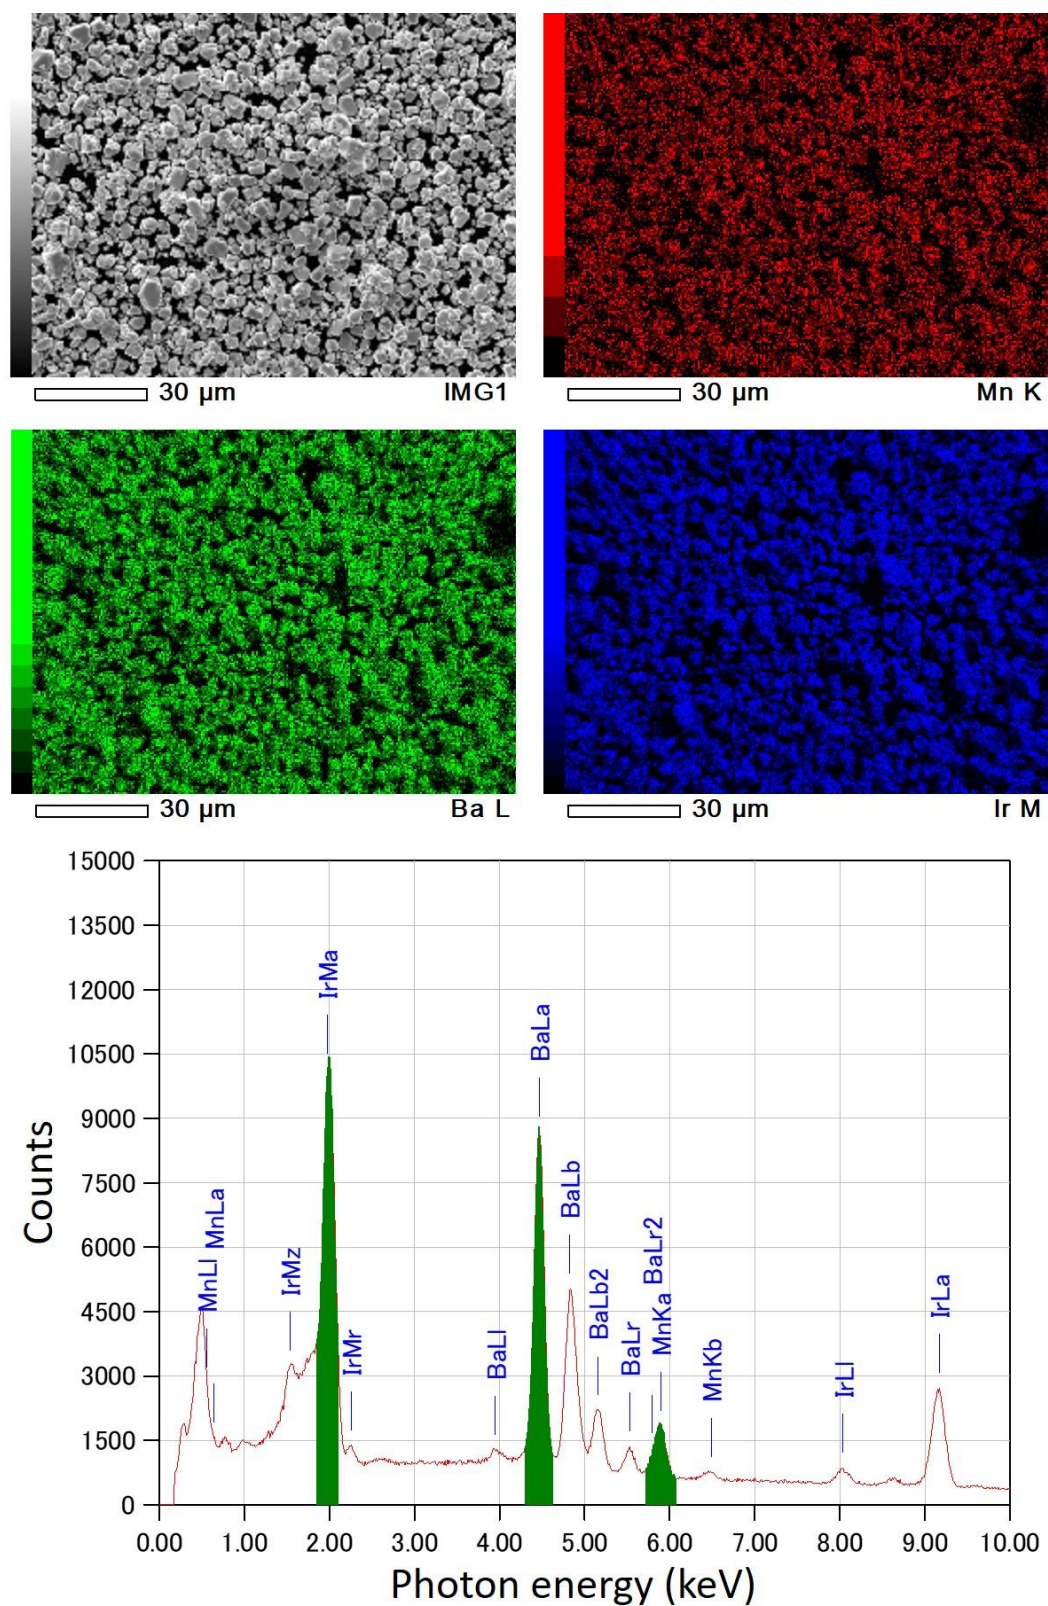

**Fig. S3.** SEM image and EDX mapping of  $\text{BaIr}_{1-x}\text{Mn}_x\text{O}_3$ . The representative SEM image, EDX elemental mapping, and EDX spectrum of  $\text{BaIr}_{1-x}\text{Mn}_x\text{O}_3$  ( $x = 0.2$ ).

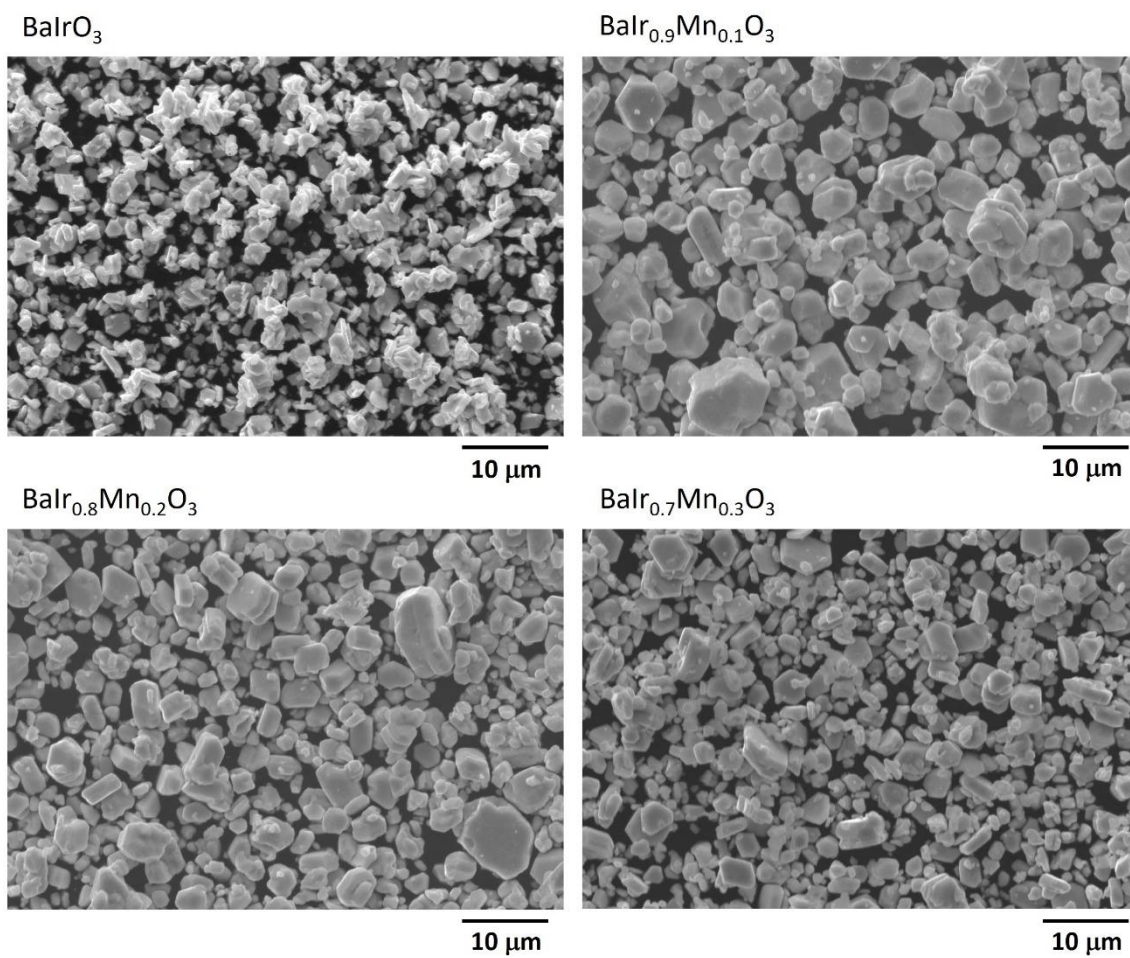

**Fig. S4.** SEM images of BaIr<sub>1-x</sub>Mn<sub>x</sub>O<sub>3</sub> ( $x = 0, 0.1, 0.2, \text{ and } 0.3$ ).

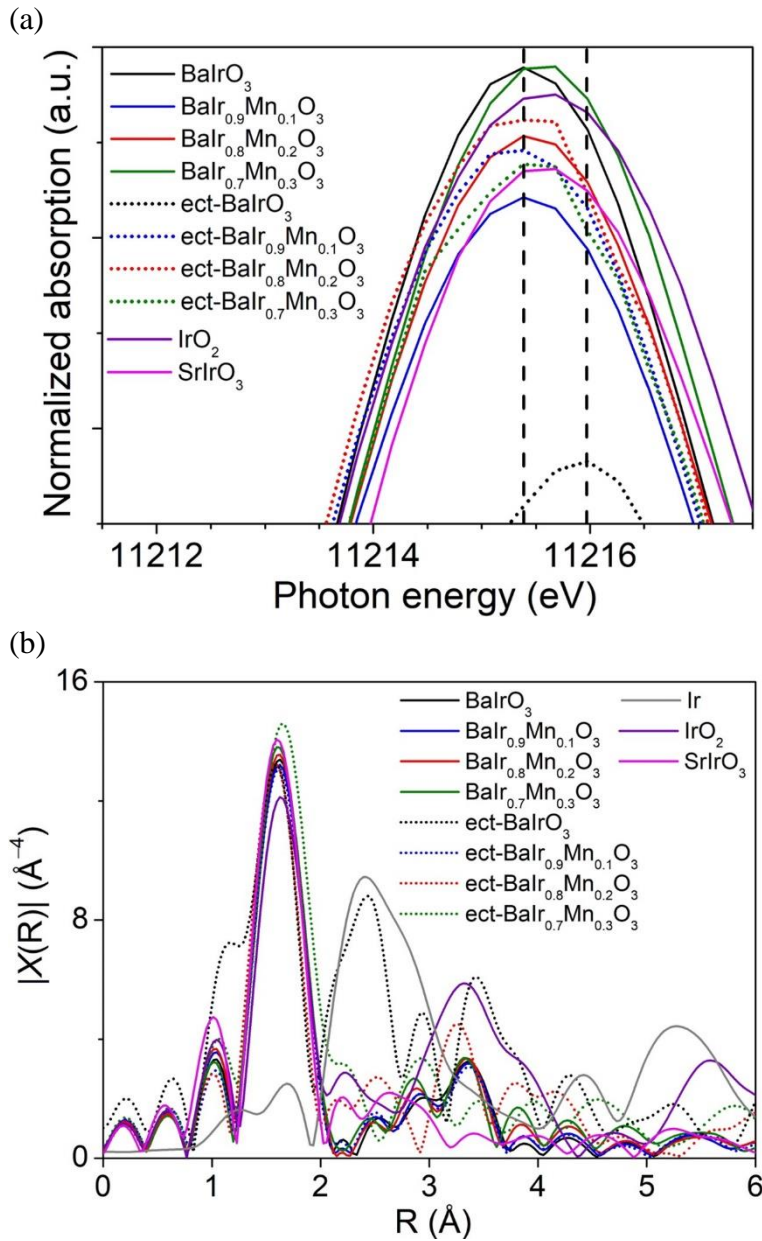

**Fig. S5.** Ir L<sub>III</sub>-edge X-ray absorption near-edge structure (XANES) and extended X-Ray absorption fine structure (EXAFS) spectra for BaIr<sub>1-x</sub>Mn<sub>x</sub>O<sub>3</sub>. (a) Expansion of the Ir L<sub>III</sub>-edge white line of pristine and electrochemically treated (ect-) BaIr<sub>1-x</sub>Mn<sub>x</sub>O<sub>3</sub> ( $x = 0, 0.1, 0.2,$  and  $0.3$ ) in Figure 3f. The Ir L<sub>III</sub>-edge white line of electrochemically treated BaIr<sub>1-x</sub>Mn<sub>x</sub>O<sub>3</sub> shows either a stronger peak intensity or a slight energy shift with respect to pristine BaIr<sub>1-x</sub>Mn<sub>x</sub>O<sub>3</sub>. Therefore, Ir<sup>4+</sup> is partially oxidized to Ir<sup>5+</sup> during the OER cycling. (b) Fourier transformed k<sup>3</sup>-weighted Ir L<sub>III</sub>-edge EXAFS for pristine and electrochemically treated (ect-) BaIr<sub>1-x</sub>Mn<sub>x</sub>O<sub>3</sub> ( $x = 0, 0.1, 0.2,$  and  $0.3$ ) in the representation form of |X(R)|.

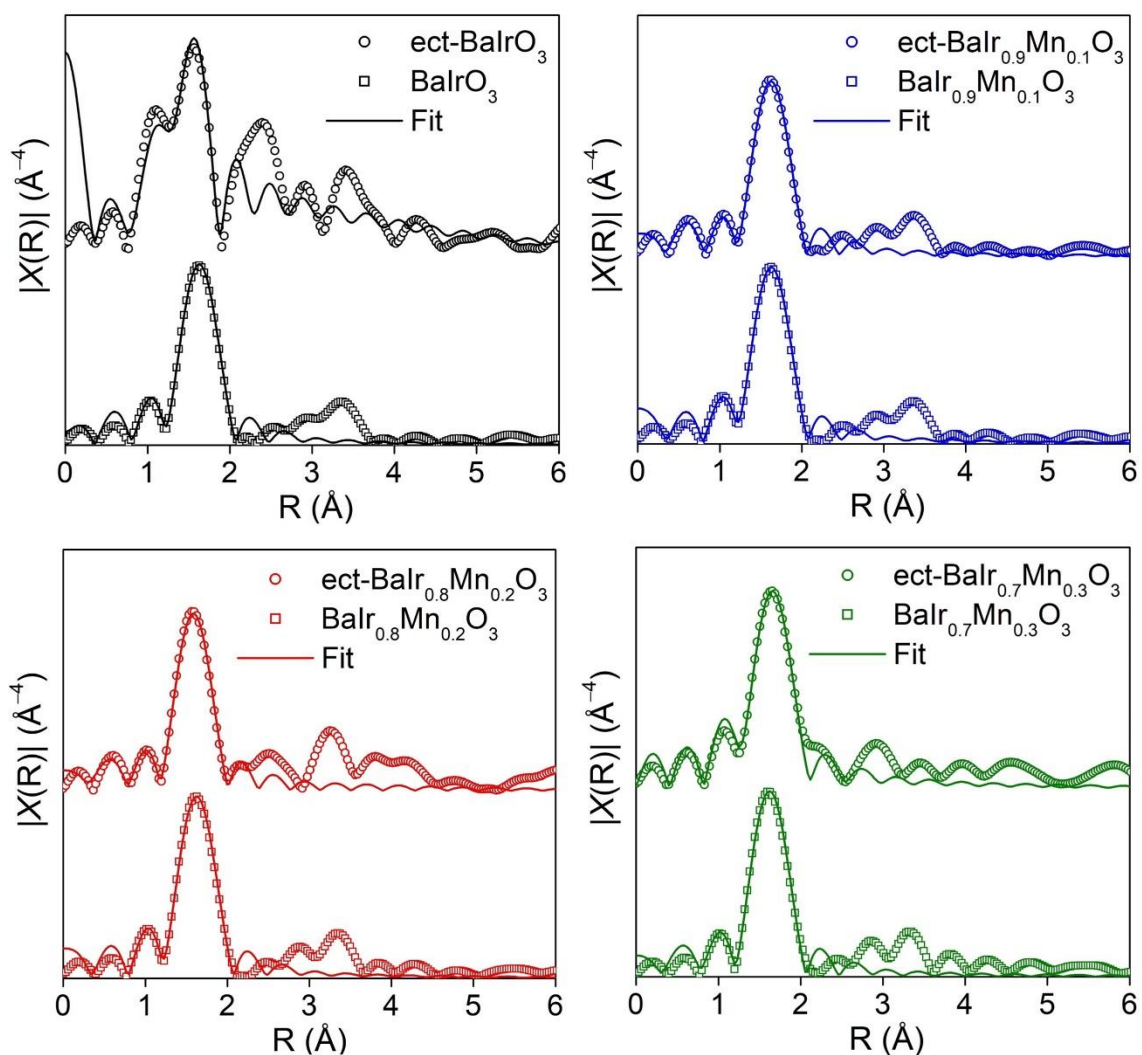

**Fig. S6.** Fourier transformed  $k^3$ -weighted Ir  $L_{III}$ -edge EXAFS fitting for pristine and electrochemically treated (ect-)  $BaIr_{1-x}Mn_xO_3$  ( $x = 0, 0.1, 0.2,$  and  $0.3$ ) in the representation form of  $|X(R)|$ . A first shell was applied for the fitting. The fitting range was  $2.8$ – $10.8 \text{ \AA}^{-1}$  in  $k$ -space, and  $1.1$ – $2.1 \text{ \AA}$  in  $R$ -space, respectively.

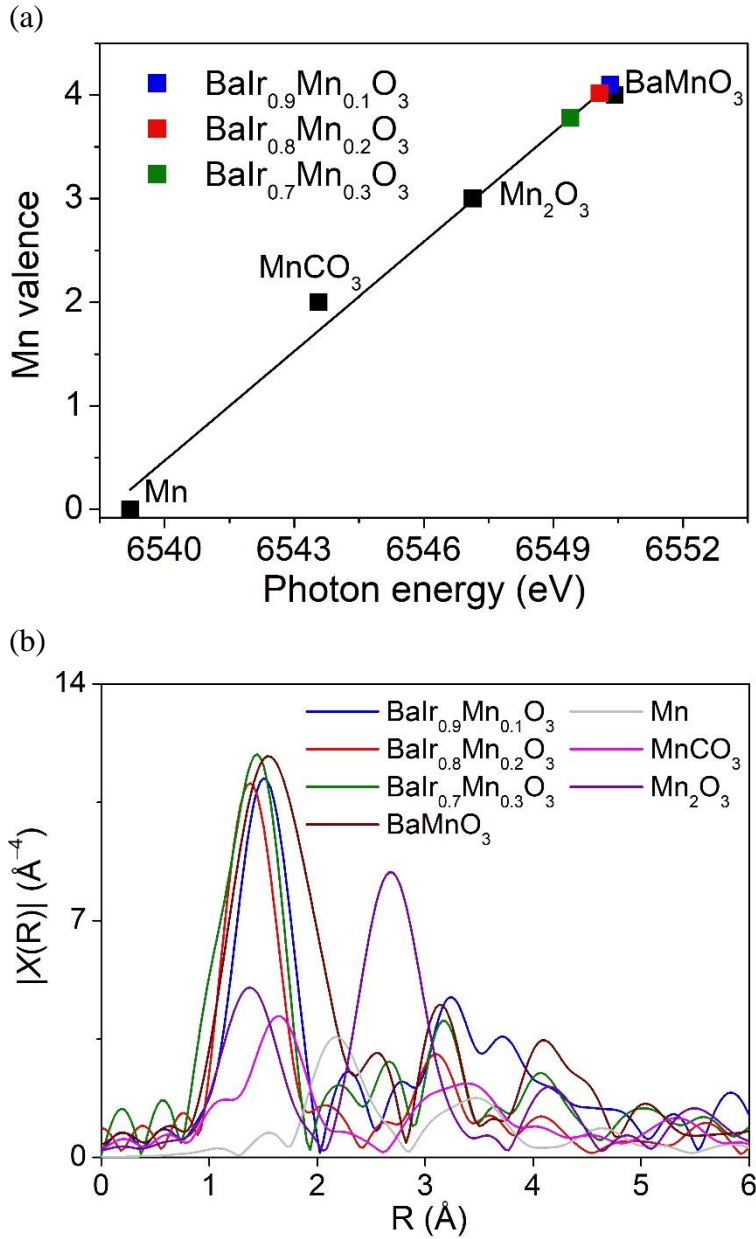

**Fig. S7.** Mn K-edge X-ray absorption near-edge structure (XANES) spectra for BaIr<sub>1-x</sub>Mn<sub>x</sub>O<sub>3</sub>. (a) Mn valence of pristine BaIr<sub>1-x</sub>Mn<sub>x</sub>O<sub>3</sub> ( $x = 0.1, 0.2,$  and  $0.3$ ), Mn, MnCO<sub>3</sub>, Mn<sub>2</sub>O<sub>3</sub> and BaMnO<sub>3</sub> as a function of the photon energy for the Mn K-edge peak. The Mn absorption edge of  $x = 0.1$  does not show any energy shift with respect to BaMnO<sub>3</sub>. Therefore, the valence of Mn is 4+ for  $x = 0.1$ , and the oxygen vacancy is negligible. On the other hand, the Mn absorption edge of  $x = 0.2$  and  $0.3$  shows visible energy shift toward Mn<sub>2</sub>O<sub>3</sub> with respect to BaMnO<sub>3</sub>. Therefore, the valence of Mn is a mixture of 3+ and 4+ for  $x = 0.2$  and  $0.3$ , and oxygen vacancies exist to some extent. (b) Fourier transformed  $k^3$ -weighted Mn K-edge EXAFS for pristine BaIr<sub>1-x</sub>Mn<sub>x</sub>O<sub>3</sub> ( $x = 0.1, 0.2,$  and  $0.3$ ) in the representation form of  $|X(R)|$ .



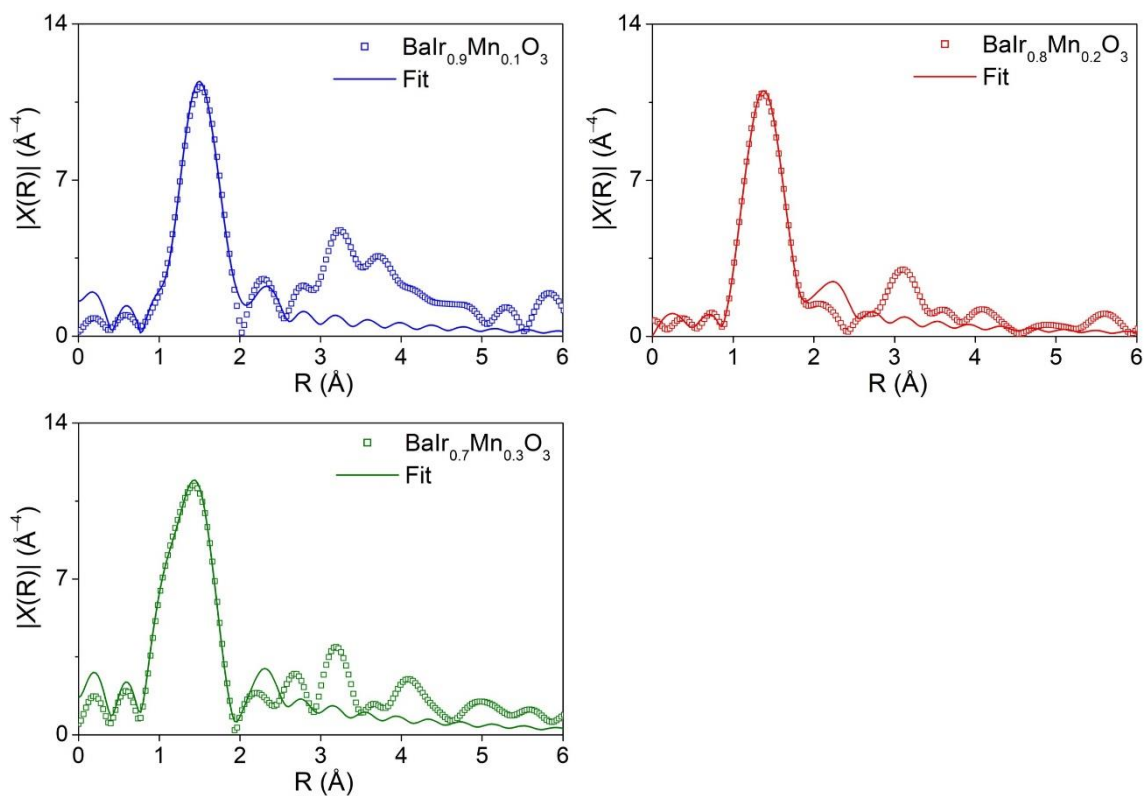

**Fig. S8.** Fourier transformed  $k^3$ -weighted Mn K-edge EXAFS fitting for pristine  $\text{Ba}_{1-x}\text{Mn}_x\text{O}_3$  ( $x = 0, 0.1, 0.2,$  and  $0.3$ ) in the representation form of  $|X(R)|$ . First and second shell was applied for the fitting. The fitting range was  $2.7\text{--}10.7 \text{\AA}^{-1}$  in  $k$ -space, and  $1.1\text{--}2.0 \text{\AA}$  in  $R$ -space, respectively.

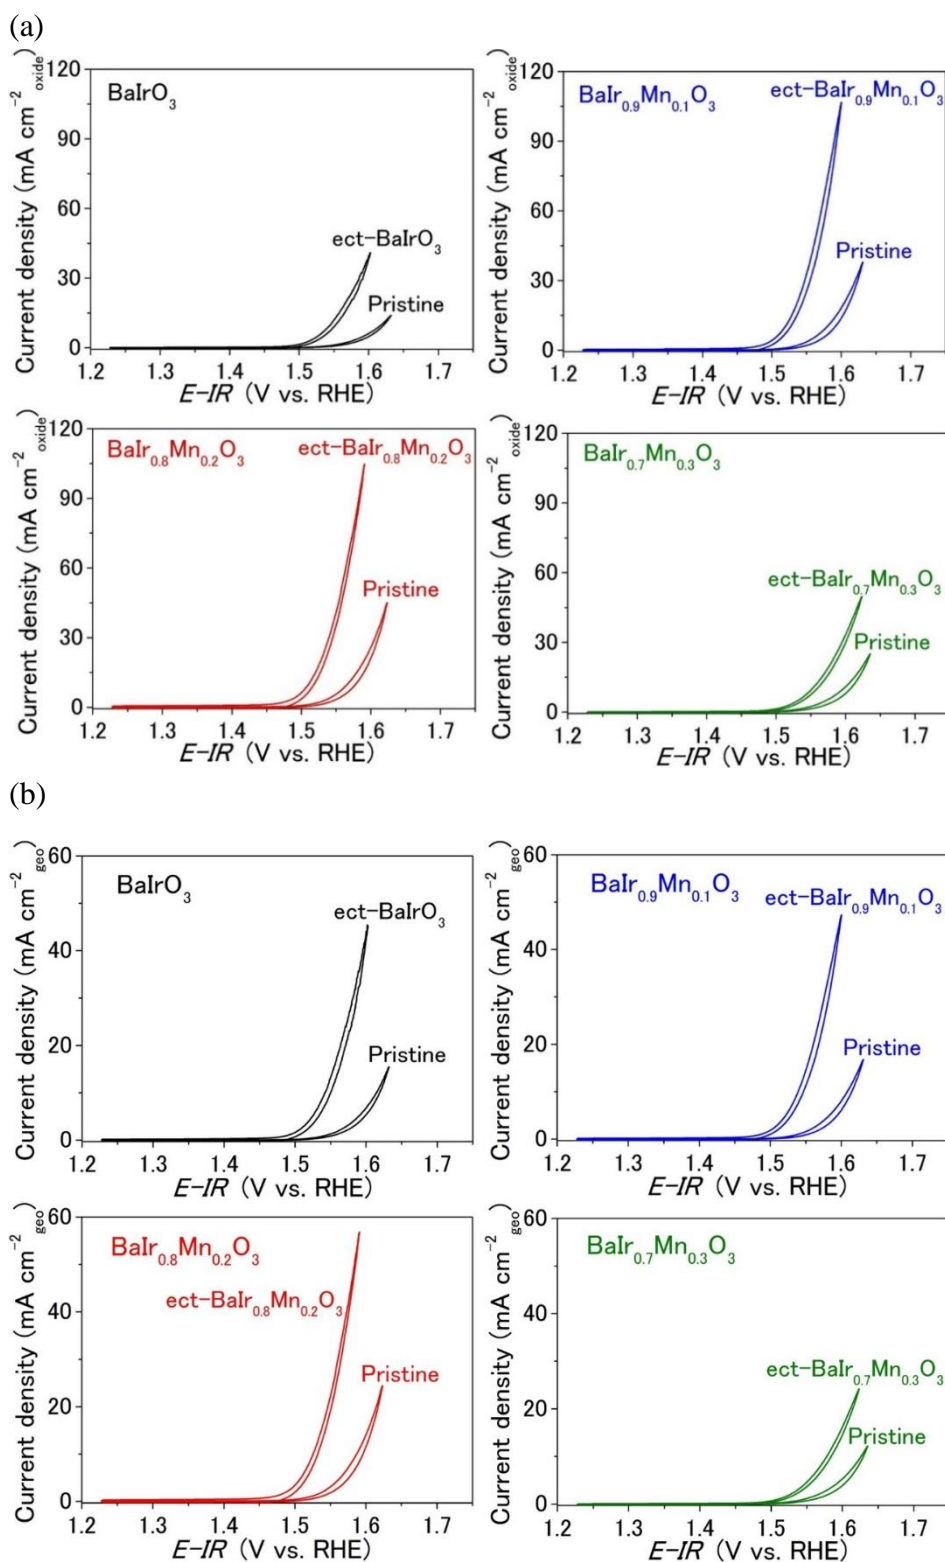

**Fig. S9.** The cyclic voltammograms for pristine and electrochemically treated (ect-)  $\text{BaIr}_{1-x}\text{Mn}_x\text{O}_3$  ( $x = 0, 0.1, 0.2,$  and  $0.3$ ) normalized to (a) the oxide surface area and (b) the geometrical electrode area in in  $0.5 \text{ M H}_2\text{SO}_4$  aqueous solution.

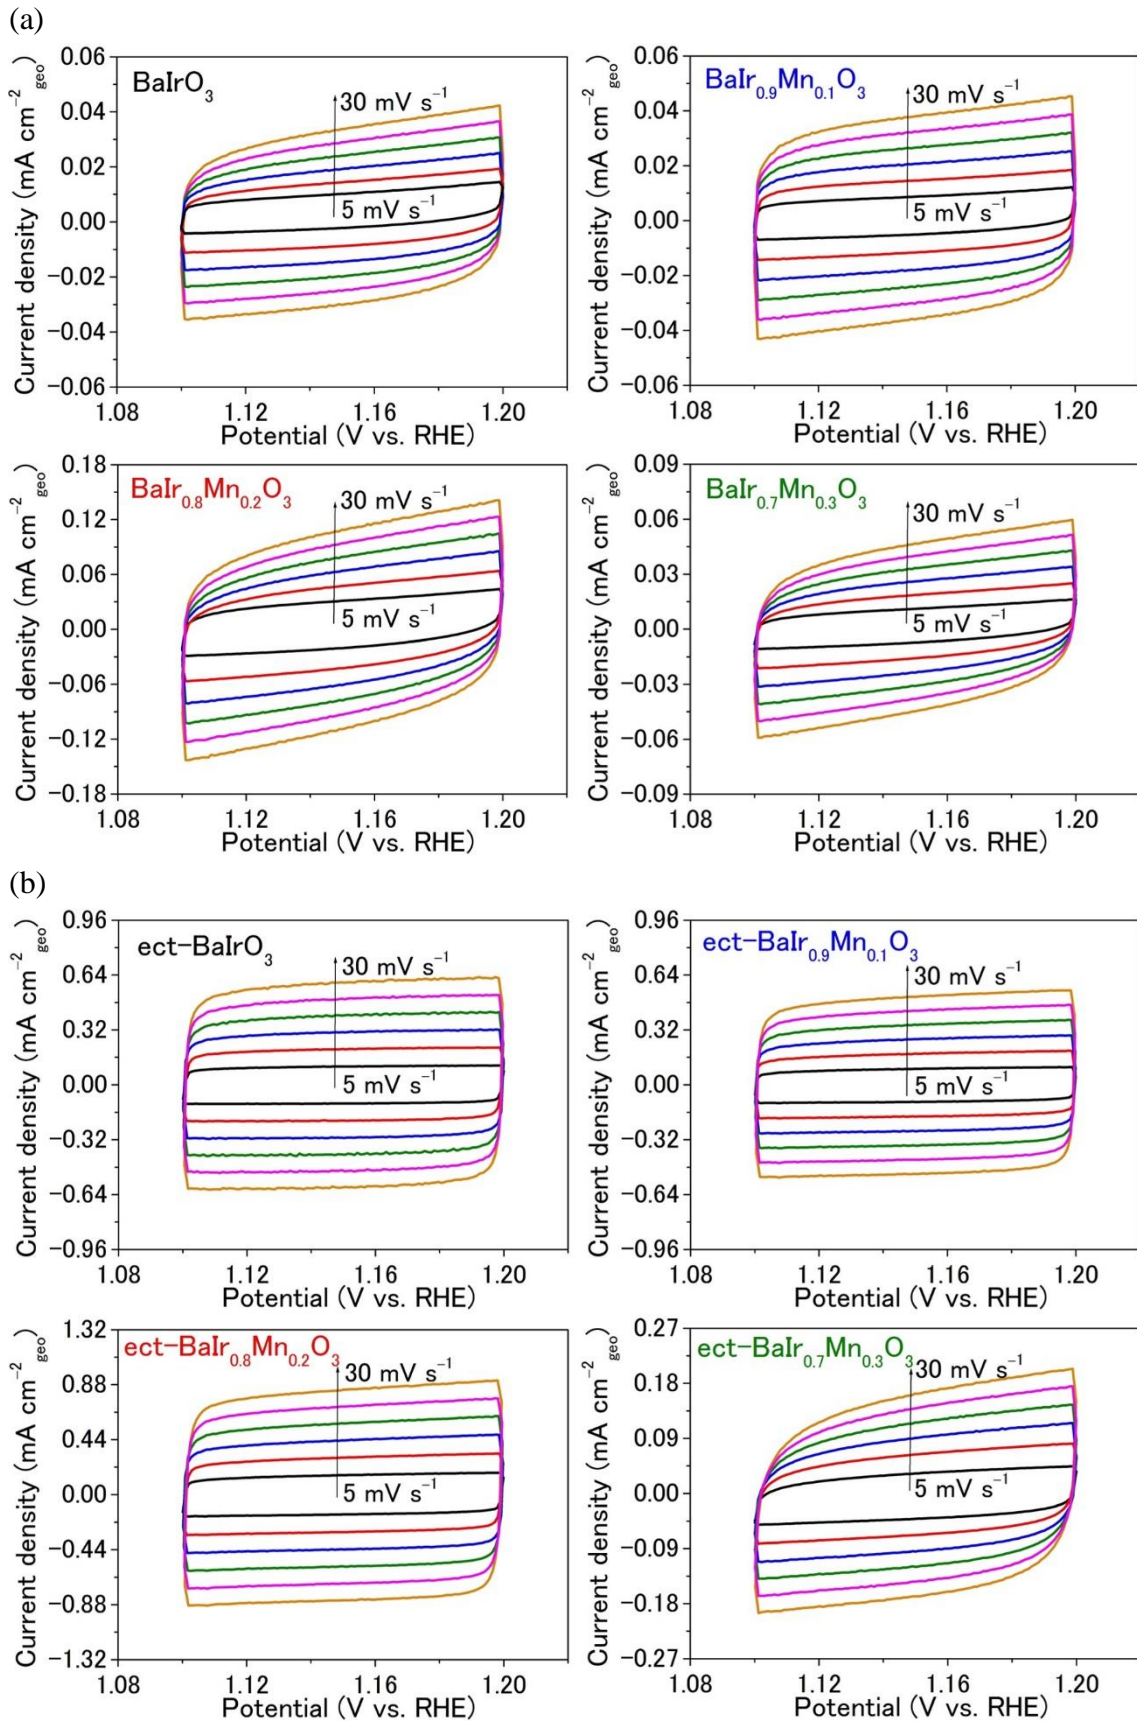

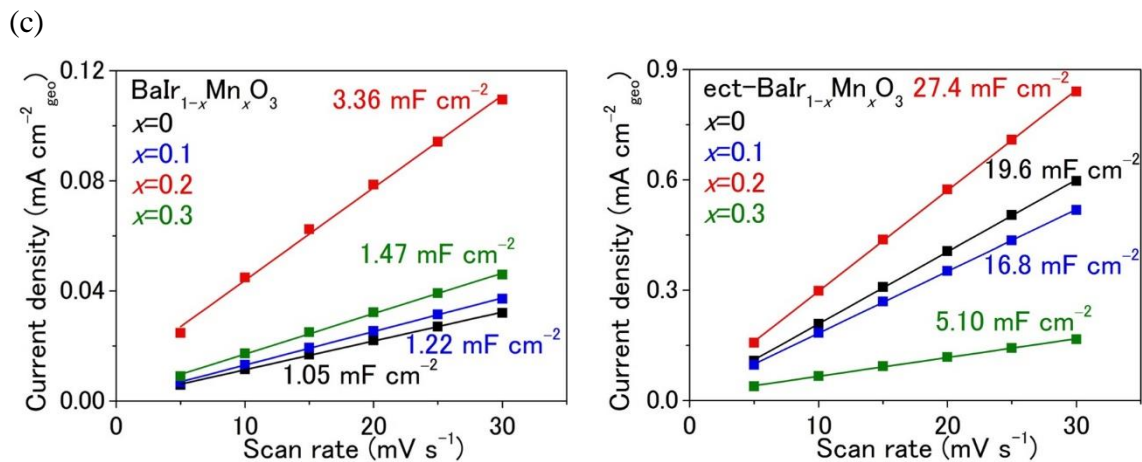

**Fig. S10.** Calculation of the double layer capacitance for  $\text{BaIr}_{1-x}\text{Mn}_x\text{O}_3$ . (a) The cyclic voltammograms for pristine  $\text{BaIr}_{1-x}\text{Mn}_x\text{O}_3$  ( $x = 0, 0.1, 0.2,$  and  $0.3$ ) measured from  $0.402\text{--}0.502$  V vs.  $\text{Hg}/\text{Hg}_2\text{SO}_4$  at the scan rate of  $5\text{--}30$   $\text{mV s}^{-1}$  in  $0.5$  M  $\text{H}_2\text{SO}_4$  aqueous solution. (b) The cyclic voltammograms for electrochemically treated (ect-)  $\text{BaIr}_{1-x}\text{Mn}_x\text{O}_3$  ( $x = 0, 0.1, 0.2, 0.3$ ) measured from  $0.402\text{--}0.502$  V vs.  $\text{Hg}/\text{Hg}_2\text{SO}_4$  at the scan rate of  $5\text{--}30$   $\text{mV s}^{-1}$  in  $0.5$  M  $\text{H}_2\text{SO}_4$  aqueous solution. (c) The scan rate dependence of the current density at  $1.15$  V vs. RHE for pristine and electrochemically treated (ect-)  $\text{BaIr}_{1-x}\text{Mn}_x\text{O}_3$  ( $x = 0, 0.1, 0.2,$  and  $0.3$ ). The slope of Fig. S10c corresponds to double layer capacitance ( $C_{dl}$ ) per disk electrode area. Since the chemical composition is similar in pristine and electrochemically treated samples, the ideal specific capacitance ( $C_s$ ) remains almost constant within each  $\text{BaIr}_{1-x}\text{Mn}_x\text{O}_3$  ( $x = 0, 0.1, 0.2,$  and  $0.3$ ). Therefore, the electrochemically active surface area (ECSA) defined by  $ECSA = C_{dl} / C_s$  [S1] is proportional to  $C_{dl}$  within each  $\text{BaIr}_{1-x}\text{Mn}_x\text{O}_3$  ( $x = 0, 0.1, 0.2,$  and  $0.3$ ).

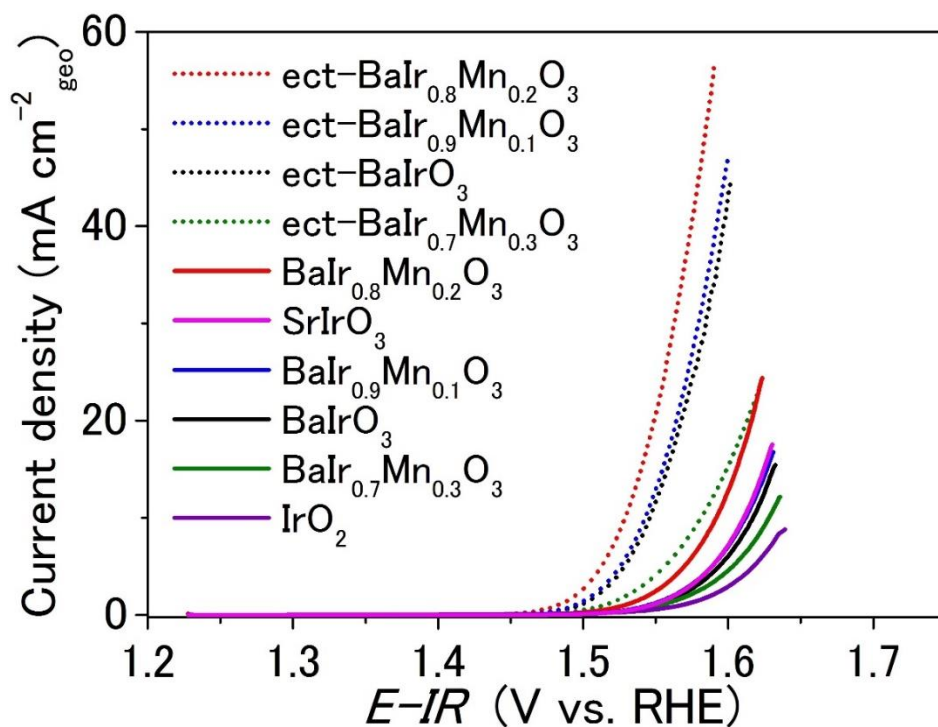

**Fig. S11.** The OER catalytic activity of  $\text{BaIr}_{1-x}\text{Mn}_x\text{O}_3$ . The linear sweep voltammograms for pristine and electrochemically treated (ect-)  $\text{BaIr}_{1-x}\text{Mn}_x\text{O}_3$  ( $x = 0, 0.1, 0.2,$  and  $0.3$ ) in  $0.5 \text{ M H}_2\text{SO}_4$  aqueous solution normalized to the geometrical electrode area ( $0.2 \times 0.2 \times \pi \text{ cm}^2$ ). Linear sweep voltammograms of  $\text{IrO}_2$  and  $\text{SrIrO}_3$  are shown for comparison.

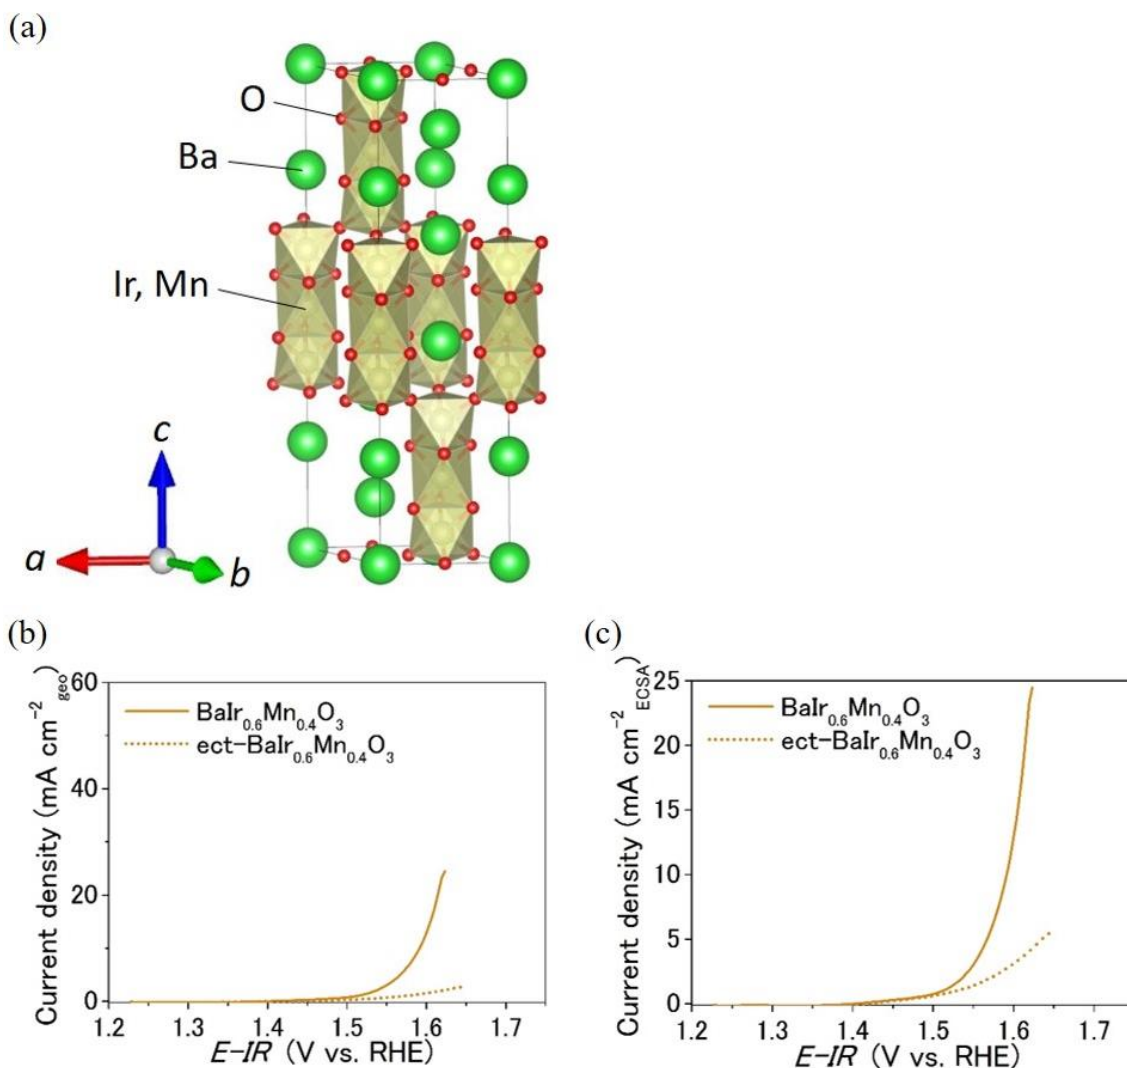

**Fig. S12.** Crystal structure and OER catalytic activity of  $\text{BaIr}_{0.6}\text{Mn}_{0.4}\text{O}_3$ . (a) Schematic representation of the crystal structure of  $\text{BaIr}_{0.6}\text{Mn}_{0.4}\text{O}_3$ .  $\text{BaIr}_{0.6}\text{Mn}_{0.4}\text{O}_3$  adopts a hexagonal structure with the space group of  $R\bar{3}mH$ , which is characterized by the ionic coordination denoted as ‘9R’ and it is isostructural with  $\text{BaRuO}_3$ <sup>33</sup>. (b) The linear sweep voltammograms for pristine and electrochemically treated (ect-)  $\text{BaIr}_{0.6}\text{Mn}_{0.4}\text{O}_3$  in 0.5 M  $\text{H}_2\text{SO}_4$  aqueous solution normalized to the geometrical electrode area ( $0.2 \times 0.2 \times \pi \text{ cm}^2$ ). (c) The linear sweep voltammograms for pristine and electrochemically treated (ect-)  $\text{BaIr}_{0.6}\text{Mn}_{0.4}\text{O}_3$  in 0.5 M  $\text{H}_2\text{SO}_4$  aqueous solution normalized to the relative ECSA. The relative ECSA is defined by the ratio of (ECSA of electrochemically treated  $\text{BaIr}_{0.6}\text{Mn}_{0.4}\text{O}_3$ )/(ECSA of pristine  $\text{BaIr}_{0.6}\text{Mn}_{0.4}\text{O}_3$ ).

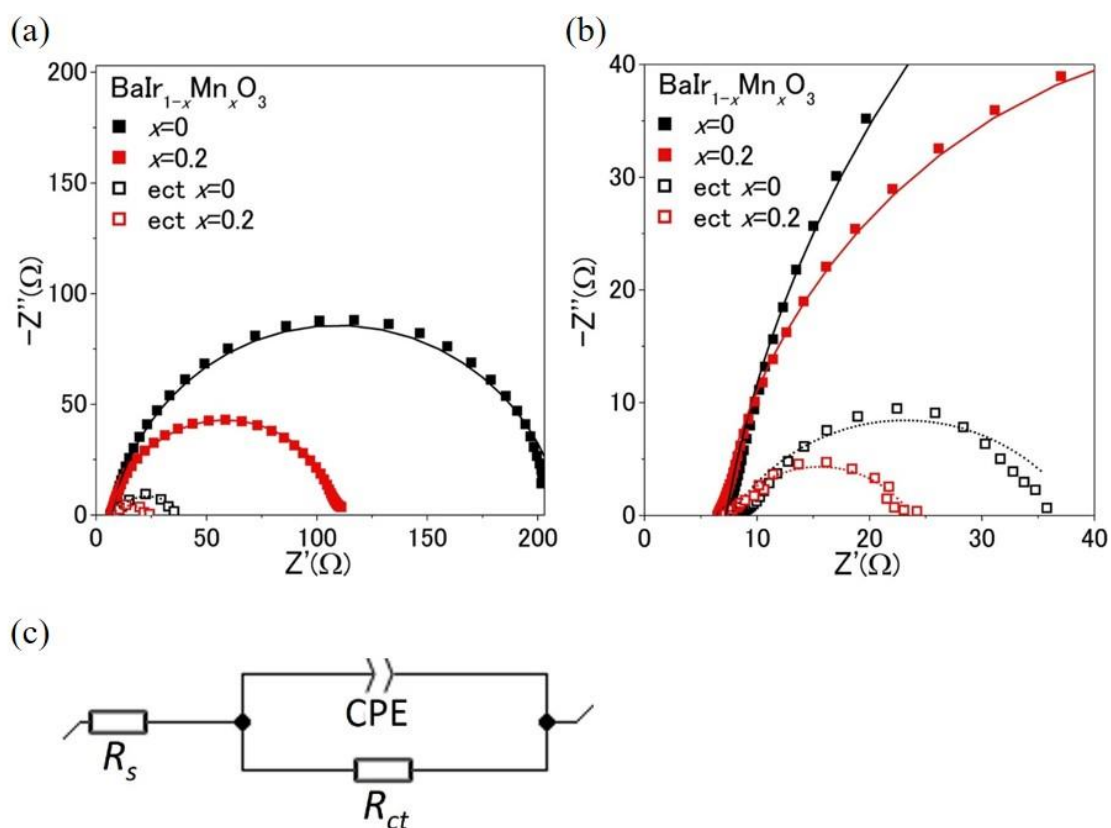

**Fig. S13.** The electrochemical impedance spectra of  $\text{BaIr}_{1-x}\text{Mn}_x\text{O}_3$ . (a) Nyquist plots for pristine and electrochemically treated (ect-)  $\text{BaIr}_{1-x}\text{Mn}_x\text{O}_3$  ( $x = 0$  and  $0.2$ ) at  $0.85\text{--}0.9$  V vs.  $\text{Hg}/\text{Hg}_2\text{SO}_4$  with an internal solution of  $0.5$  M  $\text{H}_2\text{SO}_4$  ( $1.548\text{--}1.598$  V vs. RHE) measured in the frequency range between  $200$  kHz and  $100$  mHz at the amplitude of  $10$  mV. (b) Expansion of Nyquist plots for pristine and electrochemically treated  $\text{BaIr}_{1-x}\text{Mn}_x\text{O}_3$  ( $x = 0$  and  $0.2$ ). (c) The equivalent circuit used for fitting the EIS.  $R_s$ ,  $R_{ct}$  and CPE denote the solution resistance, the charge transfer resistance and the constant phase element, respectively.

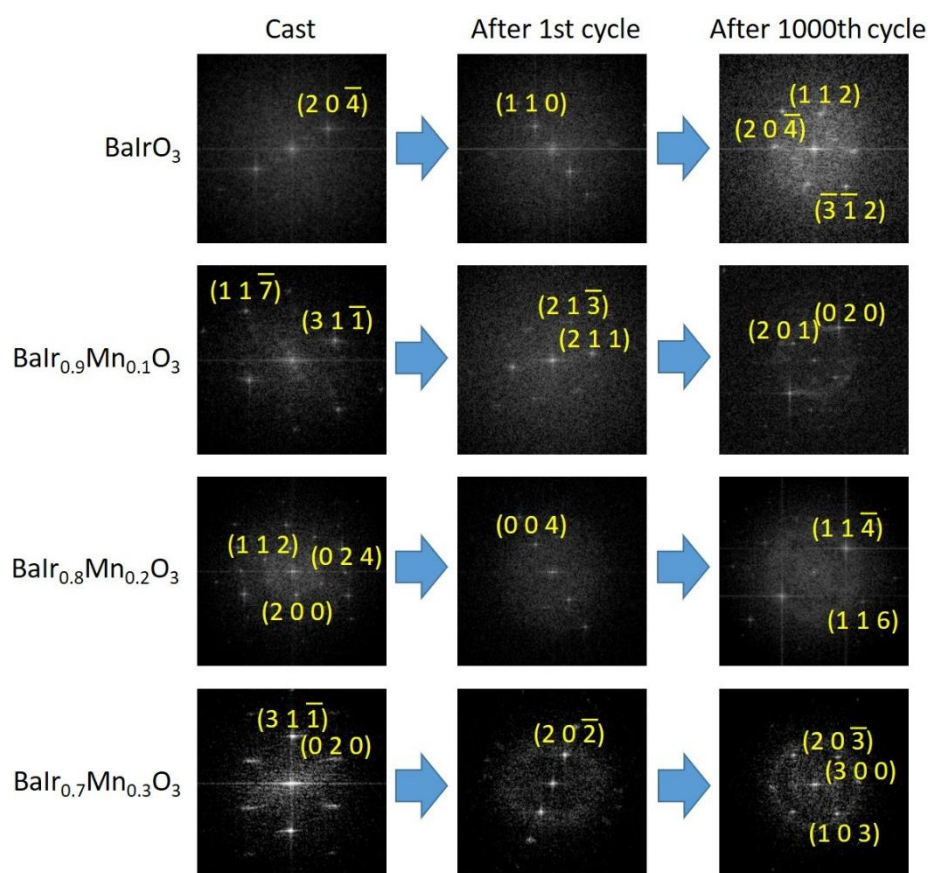

**Fig. S14.** Expansion of fast Fourier transform (FFT) images of BaIr<sub>1-x</sub>Mn<sub>x</sub>O<sub>3</sub>. FFT images of as-cast, after 1st and 1000 OER cycles for BaIr<sub>1-x</sub>Mn<sub>x</sub>O<sub>3</sub> ( $x = 0, 0.1, 0.2,$  and  $0.3$ ) are shown. All the FFT images were obtained from the surface regions of  $10 \times 10 \text{ nm}^2$ .



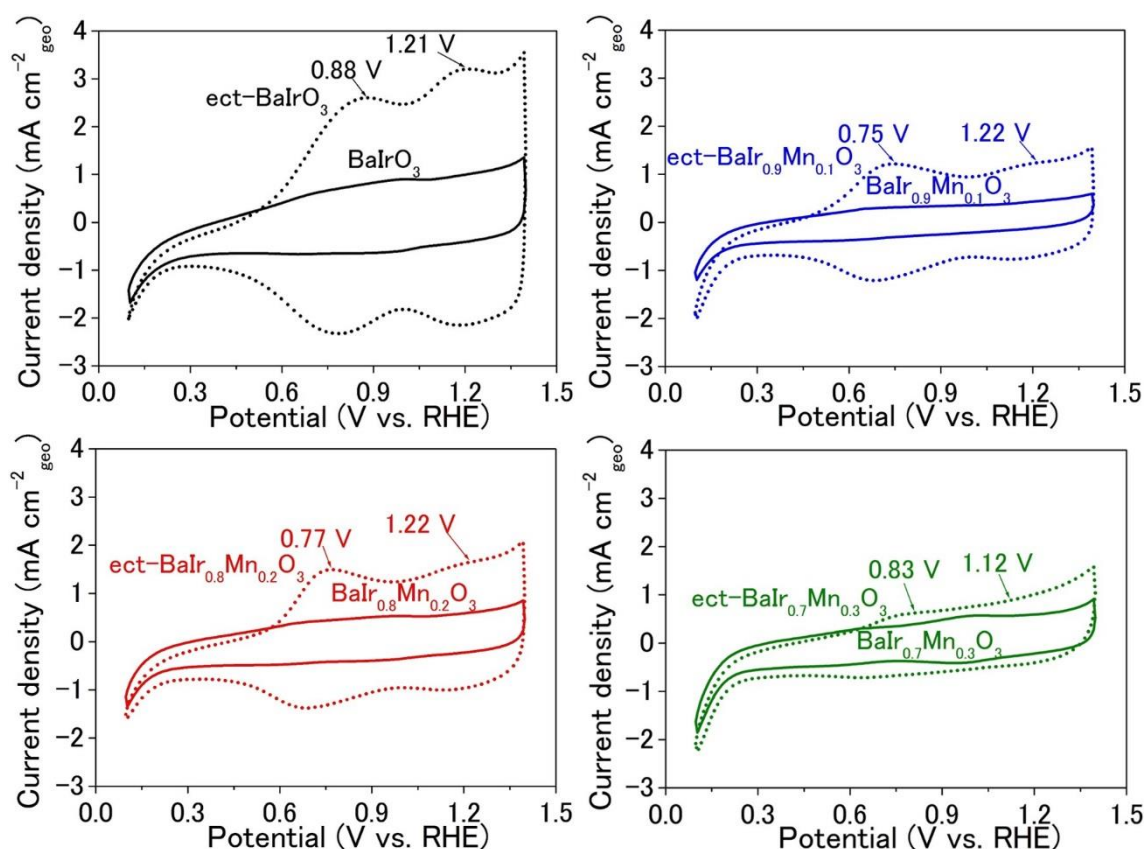

**Fig. S15.** The redox behavior of  $\text{BaIr}_{1-x}\text{Mn}_x\text{O}_3$ . The cyclic voltammograms for pristine and electrochemically treated (ect-)  $\text{BaIr}_{1-x}\text{Mn}_x\text{O}_3$  ( $x = 0, 0.1, 0.2,$  and  $0.3$ ) measured from  $-0.6$ – $0.7$  V vs.  $\text{Hg}/\text{Hg}_2\text{SO}_4$  at the scan rate of  $100 \text{ mVs}^{-1}$  in  $0.5 \text{ M H}_2\text{SO}_4$  aqueous solution. The arrows in the figure demonstrate the Ir oxidation peak potential for  $\text{BaIr}_{1-x}\text{Mn}_x\text{O}_3$ . The first Ir oxidation peak of  $\text{BaIr}_{1-x}\text{Mn}_x\text{O}_3$  originating from the oxidation from  $\text{Ir}^{3+}$  to  $\text{Ir}^{4+}$  appears at a lower potential than that of  $\text{BaIrO}_3$ , which indicates that Mn is a redox-inactive element for the  $\text{Ir}^{3+}/\text{Ir}^{4+}$  redox couple. The second Ir oxidation peak of  $\text{BaIr}_{1-x}\text{Mn}_x\text{O}_3$  originating from the oxidation from  $\text{Ir}^{4+}$  to  $\text{Ir}^{5+}$  appears at a lower ( $x=0.3$ ) or almost the same potential ( $x=0.1$  and  $0.2$ ) in comparison with  $\text{BaIrO}_3$ , which indicates that Mn is also a redox-inactive element for the  $\text{Ir}^{4+}/\text{Ir}^{5+}$  redox couple. Therefore,  $\text{Ir}^{4+}$  is partially oxidized to  $\text{Ir}^{5+}$  during the OER mainly due to the Ir-site dissolution in  $\text{BaIr}_{1-x}\text{Mn}_x\text{O}_3$  (and not because of the valence change of Mn).

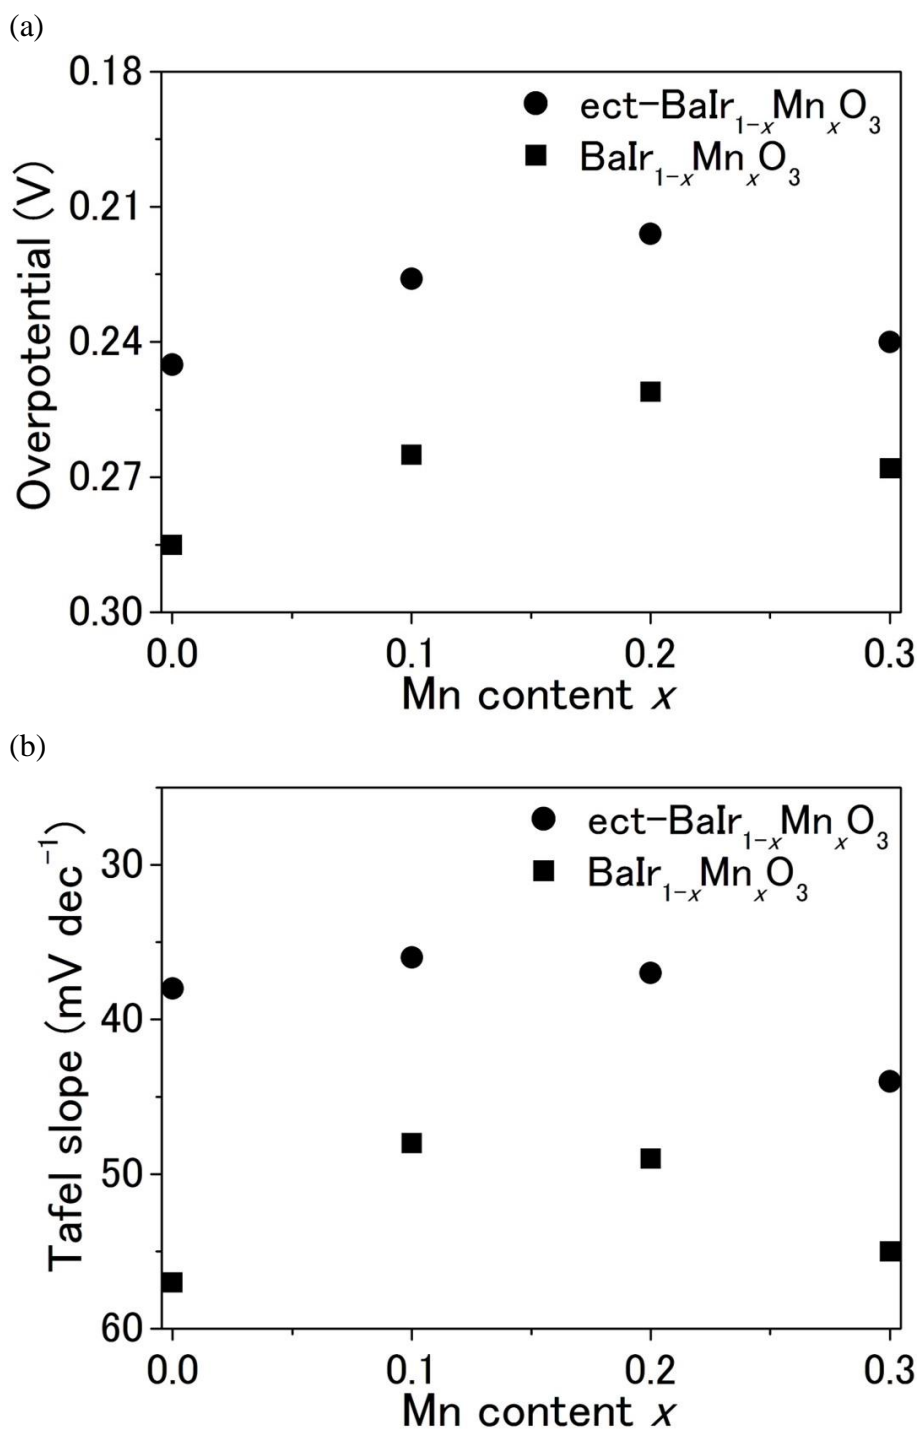

**Fig. S16.** Overpotential and Tafel slope of BaIr<sub>1-x</sub>Mn<sub>x</sub>O<sub>3</sub>. (a) The relationship between the Mn content  $x$  and the overpotential (at 0.2 mA/cm<sup>2</sup>) of pristine and electrochemically treated (ect-) BaIr<sub>1-x</sub>Mn<sub>x</sub>O<sub>3</sub> ( $x = 0, 0.1, 0.2,$  and  $0.3$ ). The overpotential ( $\eta$ ) was determined from the onset potential ( $E_{onset}$ ) by  $\eta = E_{onset} - 1.23$  V. (b) The relationship between the Mn content  $x$  and the Tafel slope of pristine and electrochemically treated (ect-) BaIr<sub>1-x</sub>Mn<sub>x</sub>O<sub>3</sub> ( $x = 0, 0.1, 0.2,$  and  $0.3$ ).

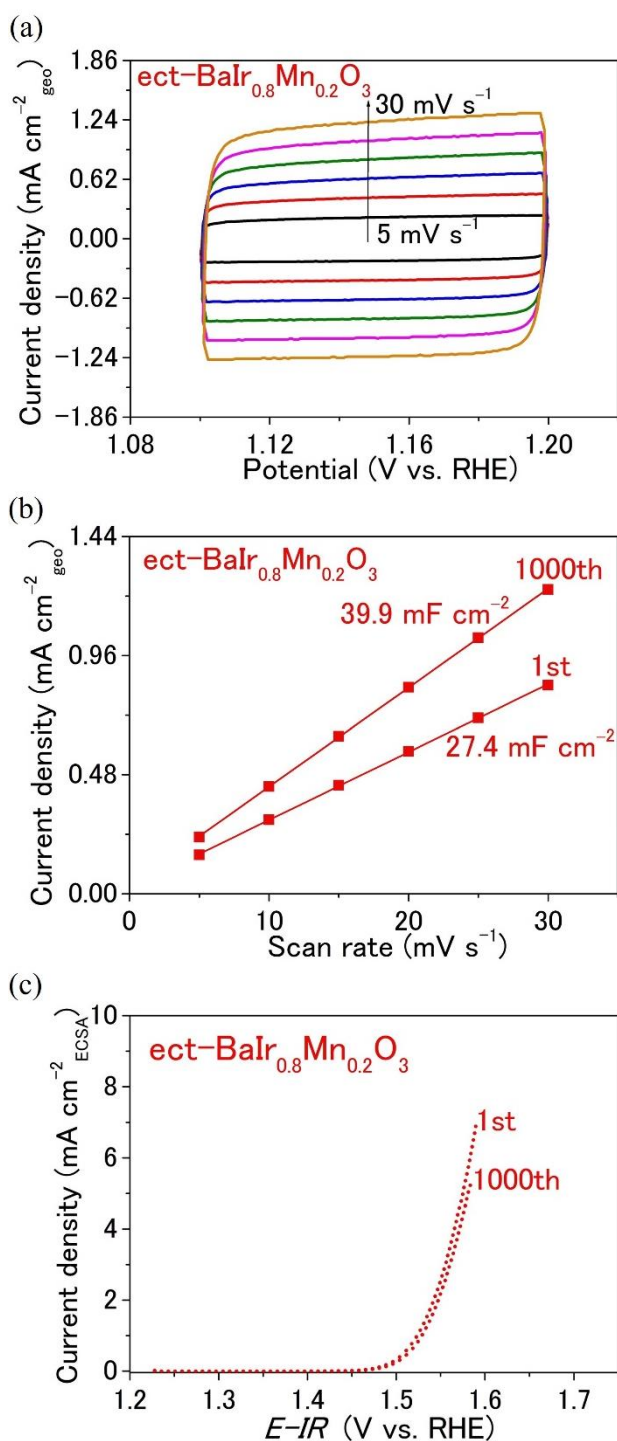

**Fig. S17.** Double layer capacitance and intrinsic activity for  $\text{BaIr}_{0.8}\text{Mn}_{0.2}\text{O}_3$ . (a) The cyclic voltammograms for electrochemically treated (ect-)  $\text{BaIr}_{0.8}\text{Mn}_{0.2}\text{O}_3$  after additional 1000 OER cycles. (b) The scan rate dependence of the current density at  $1.15 \text{ V vs. RHE}$  for electrochemically treated (ect-)  $\text{BaIr}_{0.8}\text{Mn}_{0.2}\text{O}_3$  after additional 1000 OER cycles. (c) The cycle dependence of the linear sweep voltammograms for electrochemically treated (ect-)  $\text{BaIr}_{0.8}\text{Mn}_{0.2}\text{O}_3$  normalized to the relative ECSA with respect to pristine  $\text{BaIr}_{0.8}\text{Mn}_{0.2}\text{O}_3$ .

**Table S1.** Crystallographic results for  $\text{BaIr}_{1-x}\text{Mn}_x\text{O}_3$ . Lattice constants for  $x=0, 0.1, 0.2,$  and  $0.3$  were obtained by conducting Rietveld refinement on the XRD profile starting from the crystal structure of  $\text{BaIrO}_3$  in JCPDS #01-080-1880. Ir-O bond distances, coordination number, and Bond Valence Sum (BVS) <sup>[S2]</sup> of Ir site were obtained by conducting extended X-Ray absorption fine structure (EXAFS) analysis. All these samples adopt the space group of  $C12/m1$ . The lattice constants are in good agreement with the previous study of  $\text{BaIr}_{1-x}\text{Mn}_x\text{O}_3$  <sup>[S3]</sup>. Normalized lattice parameters,  $a_N, b_N,$  and  $c_N$  were calculated by  $a_N = a/\sqrt{6}, b_N = b/\sqrt{2}, c_N = c(\sin\beta)/2\sqrt{3}$  on the basis of pseudo-cubic perovskite form as in the previous study of  $\text{BaIr}_{1-x}\text{Mn}_x\text{O}_3$  <sup>[S3]</sup>. The decrease in Ir-O distance or the increase in coordination number corresponds to the stronger bonding of Ir-O.  $\text{Ir}_{\text{BVS}}$  denote the Ir-O bond valence sum around Ir. The bond valence sum of  $\text{BaIr}_{1-x}\text{Mn}_x\text{O}_3$  ( $x=0.1, 0.2,$  and  $0.3$ ) does not show any shift before and after the OER (even after 1000 OER cycles).

| Material                               | $\text{BaIrO}_3$ | $\text{BaIr}_{0.9}\text{Mn}_{0.1}\text{O}_3$ | $\text{BaIr}_{0.8}\text{Mn}_{0.2}\text{O}_3$ | $\text{BaIr}_{0.7}\text{Mn}_{0.3}\text{O}_3$ |
|----------------------------------------|------------------|----------------------------------------------|----------------------------------------------|----------------------------------------------|
| $a$ (Å)                                | 10.0032 (3)      | 9.9519(2)                                    | 9.9486(3)                                    | 9.9341(4)                                    |
| $b$ (Å)                                | 5.7567(2)        | 5.7318(2)                                    | 5.7338(2)                                    | 5.7292(1)                                    |
| $c$ (Å)                                | 15.1693(6)       | 15.0350(7)                                   | 14.9467(6)                                   | 14.8548(6)                                   |
| $V$ (Å <sup>3</sup> )                  | 850.28(4)        | 834.98(4)                                    | 830.28(3)                                    | 823.06(5)                                    |
| Z (formula units)                      | 12               | 12                                           | 12                                           | 12                                           |
| $a_N$ (Å)                              | 4.0838(1)        | 4.0629(1)                                    | 4.0615(1)                                    | 4.0556(2)                                    |
| $b_N$ (Å)                              | 4.0706(1)        | 4.0530(1)                                    | 4.0544(1)                                    | 4.0511(1)                                    |
| $c_N$ (Å)                              | 4.2624(2)        | 4.2256(2)                                    | 4.2017(2)                                    | 4.1746(2)                                    |
| $V_N$ (Å <sup>3</sup> )                | 70.857(3)        | 69.582(3)                                    | 69.190(3)                                    | 68.588(4)                                    |
| $\beta$ (deg.)                         | 103.250(3)       | 103.199(4)                                   | 103.132(4)                                   | 103.216(4)                                   |
| $\langle\text{Ir-O}\rangle$ (Å)        | 2.024(8)         | 2.022(11)                                    | 2.022(8)                                     | 2.018(9)                                     |
| $\langle\text{Ir-O}\rangle$ of Ect (Å) | 2.064(13)        | 2.020(10)                                    | 2.000(12)                                    | 2.032(23)                                    |
| Coordination number                    | 6 (fixed)        | 5.9(3)                                       | 6.0(2)                                       | 6.2(3)                                       |
| Coordination of Ect                    | 5.5(9)           | 5.9(3)                                       | 5.7(4)                                       | 6.7(7)                                       |
| $\text{Ir}_{\text{BVS}}$               | 4.0              | 3.9(2)                                       | 4.0(1)                                       | 4.1(2)                                       |
| $\text{Ir}_{\text{BVS}}$ of Ect        | 3.3(5)           | 3.9(2)                                       | 4.0(3)                                       | 4.3(4)                                       |
| $\chi^2$                               | 8.88             | 9.78                                         | 8.58                                         | 7.13                                         |
| $R_{\text{wp}}$                        | 0.0954           | 0.1186                                       | 0.1123                                       | 0.0965                                       |

**Table S2.** BET Surface area of  $\text{BaIr}_{1-x}\text{Mn}_x\text{O}_3$ ,  $\text{SrIrO}_3$ , and  $\text{IrO}_2$ . The specific surface area  $A_s$  was determined by krypton BET surface area measurements at 77 K using a surface area analyzer (BELSORP-max II, BEL Japan Inc., Japan).

| Material                                     | $A_s$ ( $\text{m}^2/\text{g}$ ) |
|----------------------------------------------|---------------------------------|
| $\text{BaIrO}_3$                             | 0.87                            |
| $\text{BaIr}_{0.9}\text{Mn}_{0.1}\text{O}_3$ | 0.35                            |
| $\text{BaIr}_{0.8}\text{Mn}_{0.2}\text{O}_3$ | 0.43                            |
| $\text{BaIr}_{0.7}\text{Mn}_{0.3}\text{O}_3$ | 0.38                            |
| $\text{SrIrO}_3$                             | 1.6                             |
| $\text{IrO}_2$                               | 0.66                            |

**Table S3.** The resistance elements of the equivalent circuit for pristine and electrochemically treated  $\text{BaIr}_{1-x}\text{Mn}_x\text{O}_3$ . These results were obtained by fitting the electrochemical impedance spectra (EIS) of (a)  $x=0$  and (b)  $x=0.2$  with the equivalent circuit in Fig. S13c.  $R_s$  and  $R_{ct}$  denote the solution resistance and the charge transfer resistance, respectively.

(a) Pristine  $x=0$

| $E$ vs. $\text{Hg}/\text{Hg}_2\text{SO}_4$ (V) | $R_s$ ( $\Omega$ ) | $R_{ct}$ ( $\Omega$ ) |
|------------------------------------------------|--------------------|-----------------------|
| 0.85                                           | 7                  | 2800                  |
| 0.9                                            | 7                  | 204                   |

(b) Pristine  $x=0.2$

| $E$ vs. $\text{Hg}/\text{Hg}_2\text{SO}_4$ (V) | $R_s$ ( $\Omega$ ) | $R_{ct}$ ( $\Omega$ ) |
|------------------------------------------------|--------------------|-----------------------|
| 0.85                                           | 7                  | 554                   |
| 0.9                                            | 7                  | 103                   |

(c) Electrochemically treated  $x=0$

| $E$ vs. $\text{Hg}/\text{Hg}_2\text{SO}_4$ (V) | $R_s$ ( $\Omega$ ) | $R_{ct}$ ( $\Omega$ ) |
|------------------------------------------------|--------------------|-----------------------|
| 0.85                                           | 7                  | 180                   |
| 0.9                                            | 8                  | 31                    |

(d) Electrochemically treated  $x=0.2$

| $E$ vs. Hg/Hg <sub>2</sub> SO <sub>4</sub> (V) | $R_s$ ( $\Omega$ ) | $R_{ct}$ ( $\Omega$ ) |
|------------------------------------------------|--------------------|-----------------------|
| 0.85                                           | 7                  | 37                    |
| 0.9                                            | 7                  | 16                    |

**Table S4.** The turnover frequency (TOF) of OER for BaIr<sub>1-x</sub>Mn<sub>x</sub>O<sub>3</sub>, SrIrO<sub>3</sub> and IrO<sub>2</sub>. TOF was calculated by  $TOF = J/4Fn$ , where  $J$  is the OER current at 1.58 V vs. RHE,  $F$  is the Faraday constant, and  $n$  is the number of moles of the Ir atom on the working electrode.

| Material                                                                       | TOF (s <sup>-1</sup> ) |
|--------------------------------------------------------------------------------|------------------------|
| Electrochemically treated BaIrO <sub>3</sub>                                   | 0.207                  |
| Electrochemically treated BaIr <sub>0.9</sub> Mn <sub>0.1</sub> O <sub>3</sub> | 0.264                  |
| Electrochemically treated BaIr <sub>0.8</sub> Mn <sub>0.2</sub> O <sub>3</sub> | 0.465                  |
| Electrochemically treated BaIr <sub>0.7</sub> Mn <sub>0.3</sub> O <sub>3</sub> | 0.121                  |
| Pristine BaIrO <sub>3</sub>                                                    | 0.0248                 |
| Pristine BaIr <sub>0.9</sub> Mn <sub>0.1</sub> O <sub>3</sub>                  | 0.0327                 |
| Pristine BaIr <sub>0.8</sub> Mn <sub>0.2</sub> O <sub>3</sub>                  | 0.0727                 |
| Pristine BaIr <sub>0.7</sub> Mn <sub>0.3</sub> O <sub>3</sub>                  | 0.0313                 |
| Electrochemically treated SrIrO <sub>3</sub>                                   | 0.0190                 |
| Pristine SrIrO <sub>3</sub>                                                    | 0.0214                 |
| IrO <sub>2</sub>                                                               | 0.00426                |

**Table S5.** Inductively coupled plasma optical emission spectroscopy (ICP-OES) results of  $\text{BaIr}_{1-x}\text{Mn}_x\text{O}_3$ . The elemental concentration of Ba, Ir and Mn in 0.5 M  $\text{H}_2\text{SO}_4$  aqueous solution after 1st and 1000 OER cycles was determined by inductively coupled plasma (ICP, SHIMADZU ICPE-9000). ND denotes that the elemental concentration is below the detection limit. The detection limit of Ba, Ir, and Mn are 0.5 ppb, 5 ppb, and 0.2 ppb, respectively. The catalyst mass was  $\sim 32 \mu\text{g}$  and the 0.5 M  $\text{H}_2\text{SO}_4$  electrolyte volume was 70 mL. Ba concentration of 1ppb corresponds to  $\sim 0.5 \%$  of Ba mass in the catalyst.

| Material               | $\text{BaIrO}_3$ | $\text{BaIr}_{0.9}\text{Mn}_{0.1}\text{O}_3$ | $\text{BaIr}_{0.8}\text{Mn}_{0.2}\text{O}_3$ | $\text{BaIr}_{0.7}\text{Mn}_{0.3}\text{O}_3$ |
|------------------------|------------------|----------------------------------------------|----------------------------------------------|----------------------------------------------|
| Ba (after 1st cycle)   | ND               | ND                                           | ND                                           | ND                                           |
| Ba (after 1000 cycles) | ND               | 1 ppb                                        | 0.8 ppb                                      | 0.8 ppb                                      |
| Ir (after 1st cycle)   | ND               | ND                                           | ND                                           | ND                                           |
| Ir (after 1000 cycles) | ND               | ND                                           | ND                                           | ND                                           |
| Mn (after 1st cycle)   | -                | ND                                           | ND                                           | ND                                           |
| Mn (after 1000 cycles) | -                | ND                                           | ND                                           | ND                                           |

### Supplementary References

- [S1] C. C. L. McCrory, S. H. Jung, J. C. Peters and T. F. Jaramillo, *J. Am. Chem. Soc.*, 2013, **135**, 16977-16987.
- [S2] I. D. Brown and D. Altermatt, *Acta Cryst.*, 1985, **B41**, 244-247.
- [S3] J. G. Zhao, L. X. Yang, Y. Yua, F. Y. Li, R. C. Yu and C. Q. Jin, *J. Solid State Chem.*, 2010, **183**, 720-726.
